# Supplementary material for: Pneumocystis jirovecii Pneumonia in Patients with Nephrotic Syndrome: Application of Lymphocyte Subset Analysis in Predicting Clinical Outcomes
Source: Hindawi journal article supplement (doi:10.1155/2020/4631297), 2020-02-21
Supplement: f1 [file 4631297.f1.pdf]

## Supplementary material

**Table S1** Underlying diseases in cases of PCP among HIV-negative patients

| Diseases                                        | N = 503     |
|-------------------------------------------------|-------------|
| Nephrotic syndrome                              | 57 (11.3%)  |
| Malignancies                                    | 205 (40.8%) |
| Autoimmune / Inflammatory diseases <sup>a</sup> | 216 (42.9%) |
| Post-transplantation                            | 13 (2.6%)   |
| Others <sup>a</sup>                             | 12 (2.4%)   |

<sup>a</sup> Nephrotic syndrome may be secondary to systemic inflammatory disorders and others. Only those cases without nephrotic syndrome development were counted.

**Table S2** Overall mortality and mortality in subgroups of the studied population

|                        | Mortality     |
|------------------------|---------------|
| Death                  | 19/57 (33.3%) |
| ICU admission          | 18/37 (48.6%) |
| Mechanical ventilation | 18/30 (60.0%) |

Data were presented as fractions and percentages.

**Table S3** Performance of models regarding the prediction of PCP mortality

|                                     | AUC   | Standard Error | 95% CI      |
|-------------------------------------|-------|----------------|-------------|
| CD4 <sup>+</sup> T lymphocyte count | 0.871 | 0.064          | 0.745-0.997 |
| T lymphocyte count + CD4/CD8 ratio  | 0.889 | 0.065          | 0.763-1.000 |
| T lymphocyte count                  | 0.820 | 0.065          | 0.693-0.947 |
| CD4/CD8 ratio                       | 0.820 | 0.072          | 0.678-0.962 |

*Abbreviations:* AUC area under the curve (receiver operating characteristic).

**Table S4** Potential alternative cut-off values of CD4<sup>+</sup> T lymphocyte count and corresponding statistics related to the prediction of mortality in nephrotic syndrome patients with PCP

| Cutpoint | Sensitivity | Specificity | LR+   | LR-   |
|----------|-------------|-------------|-------|-------|
| ≥ 40     | 96.77%      | 41.67%      | 1.659 | 0.077 |
| ≥ 63     | 93.55%      | 66.67%      | 2.806 | 0.097 |
| ≥ 71     | 90.32%      | 83.33%      | 5.419 | 0.116 |
| ≥ 174    | 51.61%      | 91.67%      | 6.194 | 0.528 |

*Abbreviations:* LR+ positive likelihood ratio, LR- negative likelihood ratio.

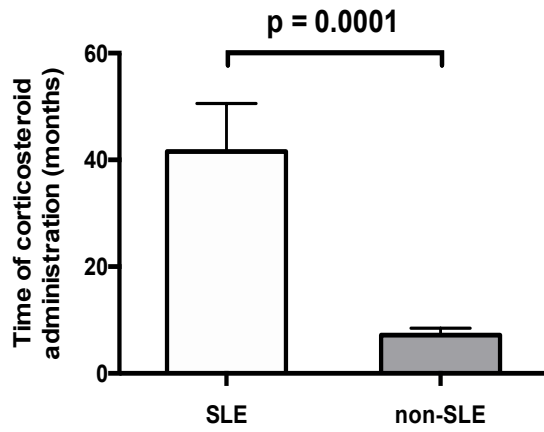

**Fig. S1** Duration of corticosteroid administration before PCP diagnosis in SLE and non-SLE patients (Error bars, mean  $\pm$  SEM)
